# Supplementary material
Source: HighWire-hosted journal article supplement (https://bmjopenquality.bmj.com/content/12/1/e001985)
Supplement: inline-supplementary-material-2 [file inline-supplementary-material-2.pdf]

**Supplementary File 2.** Patients lost to follow-up vs. included in final analysis after six months of automated refill intervention. Mean (SD) unless otherwise noted.

| <b>Demographics</b>                 | <b>Included in primary analysis<br/>n = 148</b> | <b>Lost to follow-up<br/>n = 51</b> |
|-------------------------------------|-------------------------------------------------|-------------------------------------|
| Age, years                          | 66.1 (10.2)                                     | 64.5 (12.3)                         |
| Female sex, No. (%)                 | 4 (3)                                           | 2 (4)                               |
| Race/ethnicity, No. (%)             |                                                 |                                     |
| White, non-Hispanic                 | 92 (62)                                         | 33 (65)                             |
| Black, non-Hispanic                 | 22 (15)                                         | 11 (22)                             |
| Hispanic                            | 9 (6)                                           | 2 (4)                               |
| Other                               | 25 (17)                                         | 5 (10)                              |
| Community-based clinic, No. (%)     | 48 (32)                                         | 25 (49)                             |
| Service connection (%) <sup>a</sup> | 75.4 (23.4)                                     | 79.4 (21.2)                         |
| Outpatient visits, prior quarter    | 10.9 (9.7)                                      | 8.6 (7.7)                           |
| PCP visits, prior quarter           | 0.7 (0.8)                                       | 0.5 (0.6)                           |

PCP = primary care provider. <sup>a</sup>Service connection is a VA-specific rating of medical disability due to military service; connection > 30% was the 2019 threshold for elimination of medication co-payments.
